# Supplementary material
Source: Springer Nature journal article supplement (https://www.springermedizin.de/resource/supplementary/12911_2008_211_MOESM1_ESM.pdf/9527386)

(a) CIT score

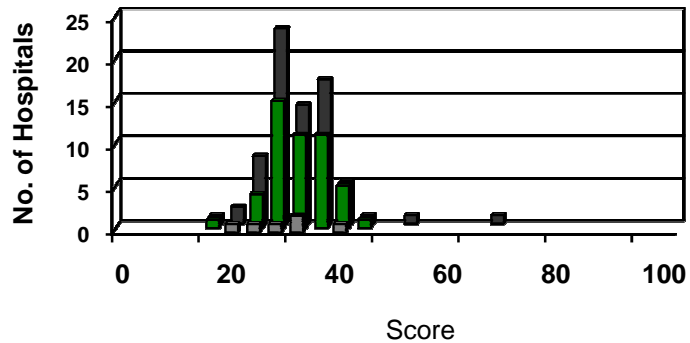

(b) Automation

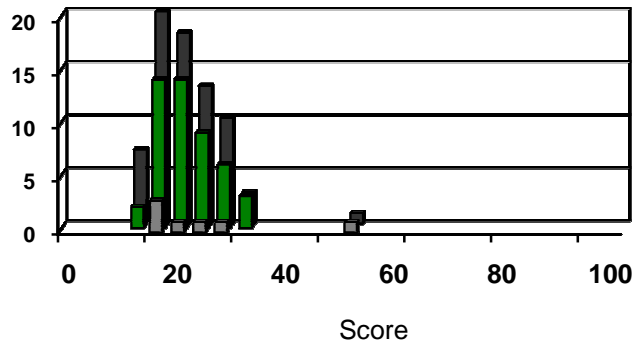

(c) Usability

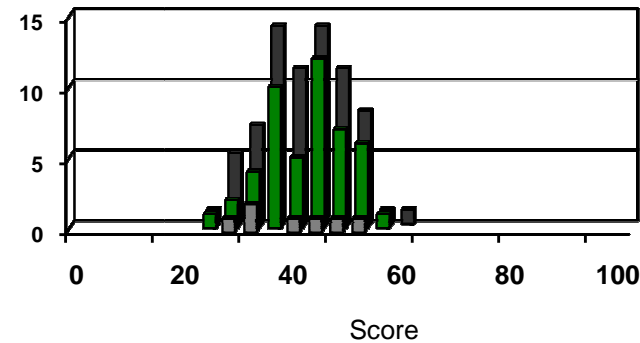

(d) Order Entry

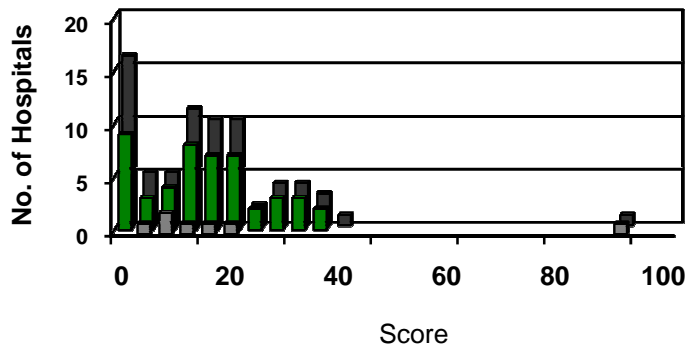

(e) Notes & Records

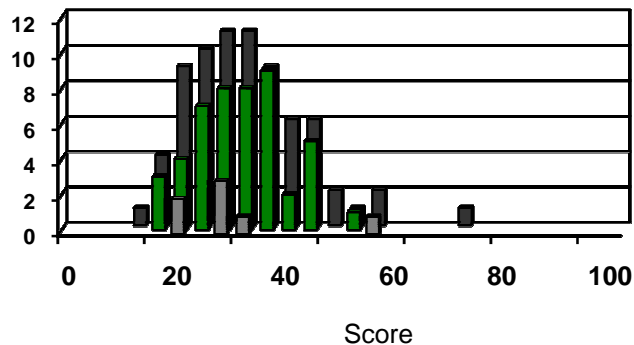

(f) Test Results

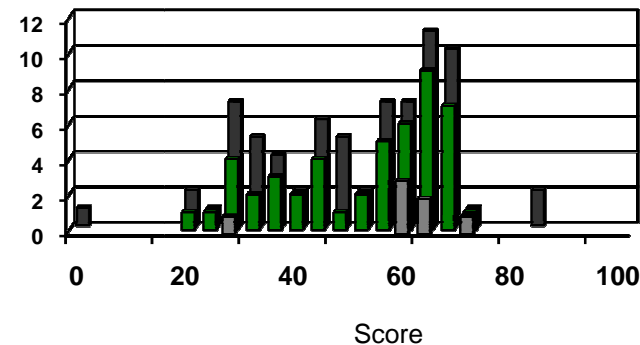

(g) Decision Support

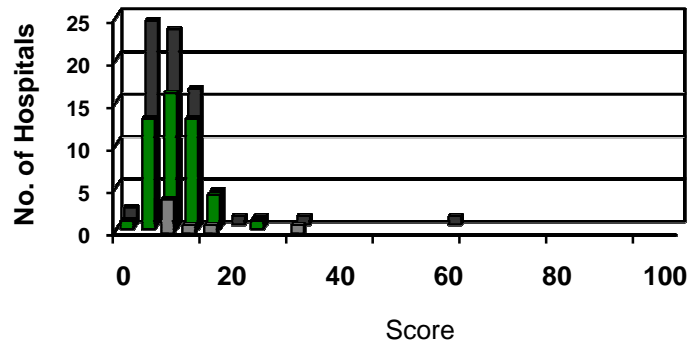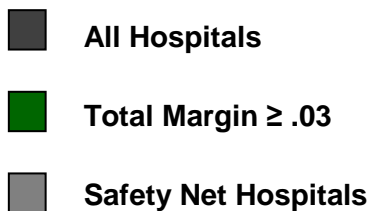

Supplement: MOESM1 [file 9527386]
